# Supplementary material
Source: MDPI journal article supplement (https://www.mdpi.com/2079-6412/9/6/366)

# Supplementary Materials: Continuous Composition Spread and Electrochemical Studies of Low Cobalt Content $\text{Li}(\text{Ni}, \text{Mn}, \text{Co})\text{O}_2$ Cathode Materials

JongSeok Jung <sup>1,2</sup>, Haena Yim <sup>1</sup>, Narendra Singh Parmar <sup>1</sup>, Jae-Seung Lee <sup>2</sup> and Ji-Won Choi <sup>1,3,\*</sup>

<sup>1</sup> Center for Electronic Materials, Korea Institute of Science and Technology, Seoul 02792, Korea; jjs0615@naver.com (J.S.J.); haena1532@kist.re.kr (H.Y.); nparmar@kist.re.kr (N.S.P.)

<sup>2</sup> Department of Materials Science and Engineering, Korea University, Seoul 02841, Korea; jslee79@korea.ac.kr

<sup>3</sup> Nano Materials and Engineering, University of Science and Technology (UST), Dae-Jeon 34113, Korea

\* Correspondence: jwchoi@kist.re.kr; Tel.: +82-29-585-556

In the main manuscript, thin films were deposited in the binary system with  $\text{LiMn}_{0.9}\text{Co}_{0.1}\text{O}_2$  and  $\text{LiNi}_{0.9}\text{Co}_{0.1}\text{O}_2$  targets by an off-axis CCS sputtering after annealing at 600 °C. We have added CCS schematic diagram, XRD measurements data and calculated lattice parameters (Table S1), charge/discharge capacity performance, SEM image with thickness profile and along with AFM top-view images for surface morphology aspects, as a supplementary information for the manuscript.

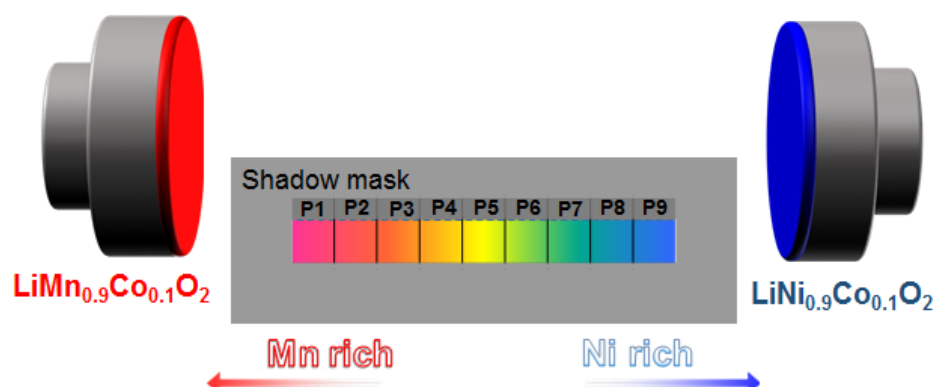

Figure S1. Schematic diagram of CCS-sputtering.

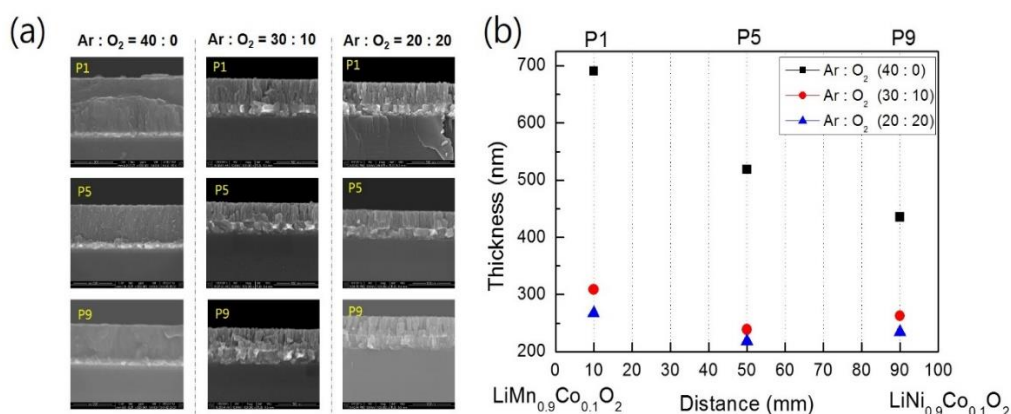

Figure S2. (a) SEM images and (b) thickness profile of thin films deposited at different gas ratios ( $\text{Ar}:\text{O}_2 = 40:0, 30:10, \text{ and } 20:20$ ).

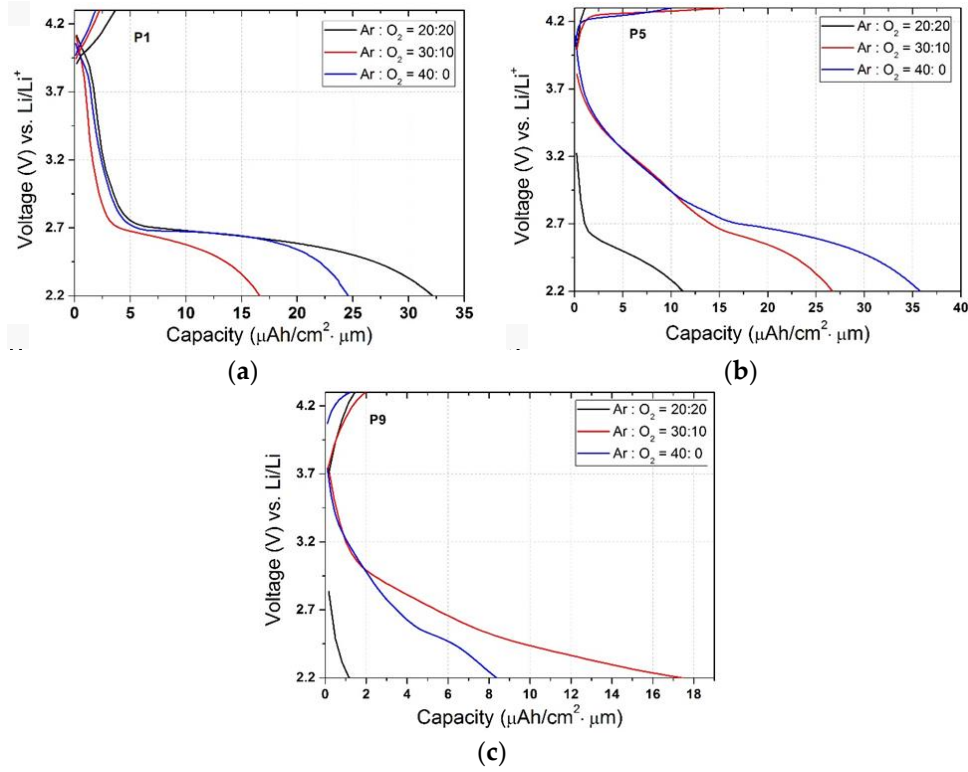

**Figure S3.** Charge/discharge tests of (a) point 1, (b) point 2 and (c) point 9 thin films grown at the gas ratios (Ar:O<sub>2</sub> = 40:0, 30:10, 20:20).

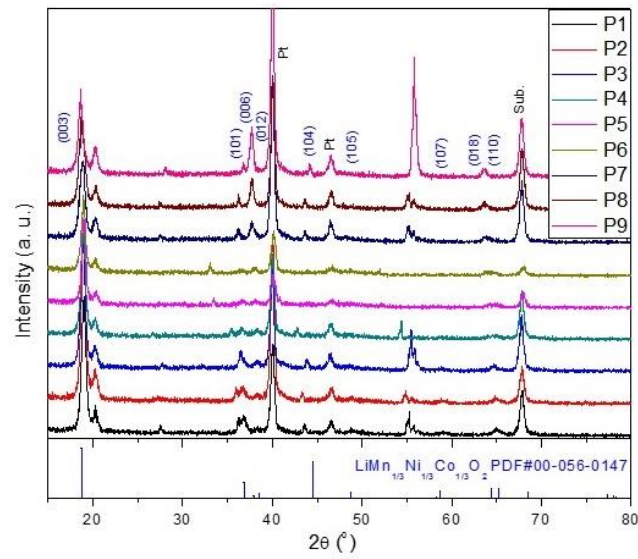

**Figure S4.** XRD patterns of thin films deposited at the optimized gas ratio (Ar:O<sub>2</sub> = 40:0) grown at different positions and were subsequently annealed at 600 °C in O<sub>2</sub> atmosphere.

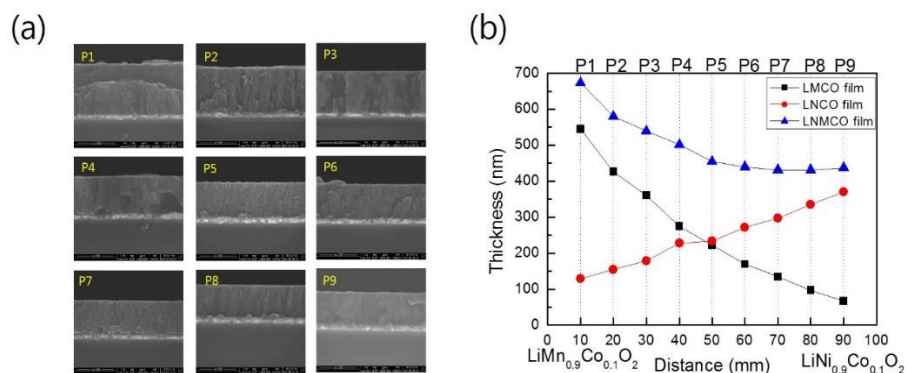

**Figure S5.** (a) SEM images and (b) thickness profile of thin films deposited at the optimized gas ratio of Ar to O<sub>2</sub> (40:0).

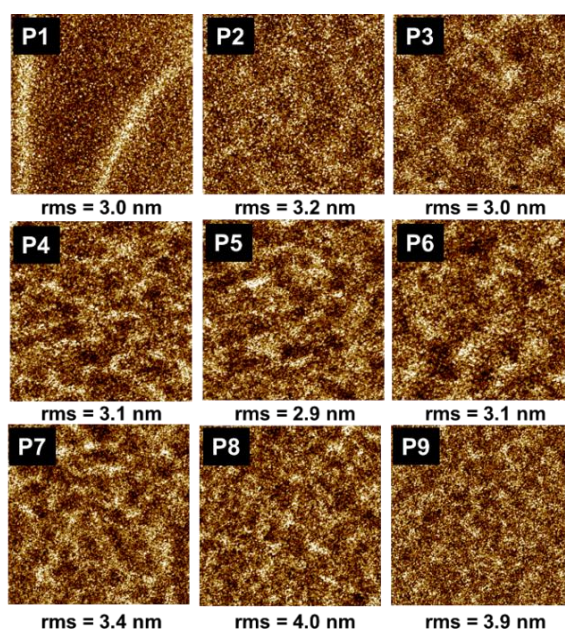

**Figure S6.** AFM top-view morphology of thin films (P1–P9) after annealing.

**Table S1.** Comparison of lattice parameters of samples from P1 to P9.

| Position | Lattice Parameters |         |        |
|----------|--------------------|---------|--------|
|          | a (Å)              | c (Å)   | c/a    |
| P1       | 2.8963             | 14.1738 | 4.8938 |
| P2       | 2.8884             | 14.1820 | 4.9100 |
| P3       | 2.8960             | 14.1955 | 4.9018 |
| P4       | 2.8930             | 14.1768 | 4.9003 |
| P5       | 2.8915             | 14.1640 | 4.8984 |
| P6       | 2.8928             | 14.1918 | 4.9059 |
| P7       | 2.8904             | 14.2664 | 4.9358 |
| P8       | 2.8904             | 14.3045 | 4.9490 |
| P9       | 2.8911             | 14.3365 | 4.9589 |

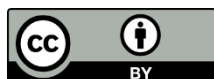

Supplement: s1 [file s1]
